# Supplementary material for: Hollow Mesoporous Silica Nanoparticles as a New Nanoscale Resistance Inducer for Fusarium Wilt Control: Size Effects and Mechanism of Action
Source: MDPI journal article supplement (doi:10.3390/ijms25084514), 2024-04-20
Supplement: s1 [file s1]

## Supplementary Materials

# Hollow Mesoporous Silica Nanoparticles as a New Nanoscale Resistance Inducer for Fusarium Wilt Control: Size Effects and Mechanism of Action

Chaopu Ding <sup>†</sup>, Yunfei Zhang <sup>†</sup>, Chongbin Chen, Junfang Wang, Mingda Qin, Yu Gu, Shujing Zhang <sup>\*</sup>, Lanying Wang and Yanping Luo <sup>\*</sup>

School of Tropical Agriculture and Forestry, Hainan University, Haikou 570228, China;

dingcp1227@163.com (C.D.); zhangyunfei2020@hainanu.edu.cn (Y.Z.);

21220951320049@hainanu.edu.cn (C.C.); 21220951320094@hainanu.edu.cn (J.W.);

21210904000018@hainanu.edu.cn (M.Q.);

20213007402@hainanu.edu.cn (Y.G.); 990992@hainanu.edu.cn (L.W.)

<sup>\*</sup> Correspondence: sjzhang@hainanu.edu.cn (S.Z.);

yanpluo2012@hainanu.edu.cn (Y.L.)

<sup>†</sup> These authors contributed equally to this work.

## **Table of contents**

- 1. SEM images of three HMSNs. (Fig. S1)**
- 2. RT-qPCR analysis of the gene expression of an antioxidant defence-related enzyme gene PAL in cowpea roots. (Fig. S2)**
- 3. Zeta potential, PDI, and average particle size of three HMSNs (Tab. S1)**
- 4. Standards of disease severity grading for Fusarium wilt in cowpea plant (Tab.S2)**
- 5. Primers for qRT-PCR assay (Tab. S3)**
- 6. Amplification program for qRT-PCR assay (Tab. S4)**

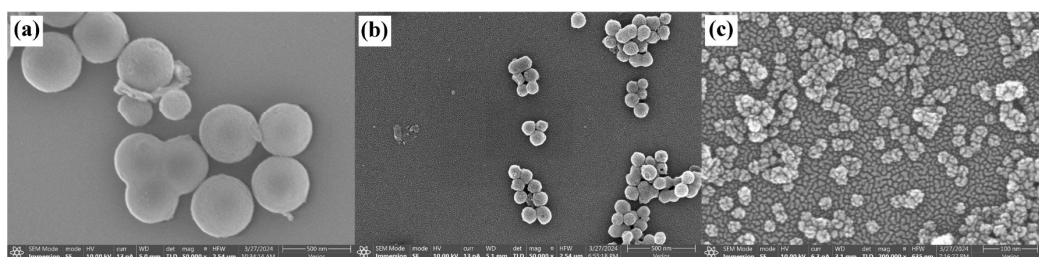

**Fig. S1 HMSNs under investigation. SEM images of (a) HMSNs-406, Scale bar: 500 nm; (b) HMSNs-96, Scale bar: 500 nm; and (c) HMSNs-19, Scale bar: 100 nm.**

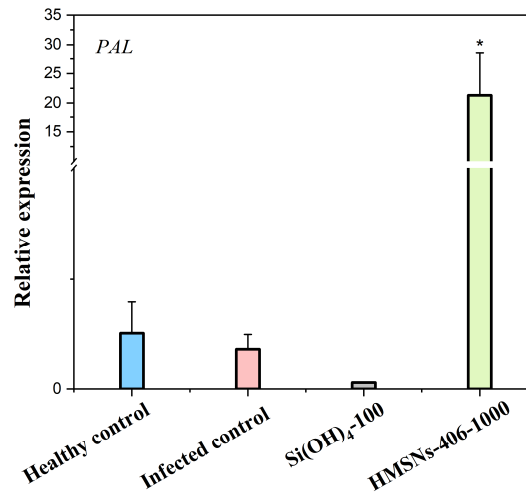

**Fig. S2 RT-qPCR analysis of the gene expression of an antioxidant defence-related enzyme gene *PAL* in cowpea roots. Root samples were collected 29 days after FOP infection. *EF1b* was used as the reference gene. The healthy control represents cowpea plants growing in the noninfected soil and treated with water. Other treatments represent cowpea plants growing in the infected soil and foliarly treated with water (the infected control), Si(OH)<sub>4</sub> (100 mg/L) or HMSNs-406 (1000 mg/L). The error bars are averages and standard deviations of three replicates. Asterisks (\*) represent significant differences as compared with the infected controls using the one-way ANOVA mode for significance testing with Dunnett's multiple comparisons test at  $P < 0.05$ .**

**Tab. S1 Zeta potential, PDI, and average particle size of three HMSNs**

| <b>HMSNs<sup>a</sup></b> | <b>Z-Average<sup>b</sup> (nm)</b> | <b>PDI<sup>c</sup></b> | <b>Zeta<sup>d</sup> (mV)</b> |
|--------------------------|-----------------------------------|------------------------|------------------------------|
| HMSNs-19                 | 59.26±0.19                        | 0.14±0.01              | -19.6±0.3                    |
| HMSNs-96                 | 202.00±0.60                       | 0.36±0.02              | -33.0±1.0                    |
| HMSNs-406                | 690.70±12.00                      | 0.32±0.01              | -31.0±0.5                    |

<sup>a</sup>HMSNs: Hollow mesoporous silica nanoparticles; <sup>b</sup>Z-Average: Average particle size; <sup>c</sup>PDI: Polydispersity index; <sup>d</sup>Zeta: Surface potential. Averages ± standard deviations.

**Tab. S2 Standards of disease severity grading for Fusarium wilt in cowpea plant**

| <b>Scale value</b> | <b>External leaf symptoms</b>                                                                   | <b>Internal vascular symptoms</b> |
|--------------------|-------------------------------------------------------------------------------------------------|-----------------------------------|
| 0                  | asymptomatic plants                                                                             | no vascular browning              |
| 1                  | slight epinastic response and mild chlorosis of the lower third of the plant                    | up to 25% vascular browning       |
| 2                  | epinastic response in between 30%–50% of the leaves and moderate chlorosis in mature leaves     | 26–50% vascular browning          |
| 3                  | epinastic response in between 60%–80% of the leaves and moderate chlorosis in the middle third  | 51%–75% vascular browning         |
| 4                  | epinastic response in all the leaves of the plant, severe chlorosis and defoliation, dead plant | >75% vascular browning            |

**Tab. S3 Primers for qRT-PCR assay**

| <b>Primers</b> | <b>Sequence (5'-3')</b>  |
|----------------|--------------------------|
| PR1-F          | ACTACAACTACGCTGCGAACAC   |
| PR1-R          | GTTACACCTCACTTTGGCACATC  |
| PR5-F          | GTGTTCATCACAAGCGGCAT     |
| PR5-R          | GGGAAGCACCTGGAGTCAAT     |
| NPR1-F         | TGCTCGGAAGTGTTGGATAAG    |
| NPR1-R         | GAAATCCCAGAGCGGCTAAA     |
| EF1b-F         | CCACTGCTGAAGAAGATGATGATG |
| EF1b-R         | AAGGACAGAAGACTTGCCACTC   |
| PAL-F          | GTTTGTGAGGGAGGAGTTAGAG   |
| PAL-R          | ATGGGAGACCCTTTCCAATC     |
| PPO-F          | GCTCCTCATAACACGGTTCATA   |
| PPO-R          | GTCCTTTCTTCCTTCTCCCAAT   |

**Tab. S4 Amplification program for qRT-PCR assay**

| <b>System</b>                        | <b>Procedure</b>                   |
|--------------------------------------|------------------------------------|
| SYBR® Premix Ex Taq™ II 5.0 µL       | Predegeneration at 95°C for 10 min |
| PCR Forward Primer (10 µM) 0.3 µL    | Cycle initiation:                  |
| PCR Reverse Primer (10 µM) 0.3 µL    | Degeneration at 95°C for 15 s      |
| cDNA solution 1.0 µL                 | Renaturation 60°C for 60 s         |
| Easy dilution (for Real Time) 3.4 µL | 40 cycles                          |
